# Supplementary material for: Porphyromonas gingivalis Peptidylarginine Deiminase, a Key Contributor in the Pathogenesis of Experimental Periodontal Disease and Experimental Arthritis
Source: PubMed Central journal article supplement (PMC4069180; doi:10.1371/journal.pone.0100838), 2014-06-24
Supplement: pone.0100838.s004.pdf [file pone.0100838.s004.pdf]

Figure 4 Paw Score/60

|                   |           | Days        | 4           | 5           | 6           | 7           | 8           | 9           | 10           |
|-------------------|-----------|-------------|-------------|-------------|-------------|-------------|-------------|-------------|--------------|
|                   | M2        |             | 1           | 2           | 0           | 7           | 3           | 4           | 5            |
|                   | M3        |             | 1           | 6           | 0.5         | 5           | 8           | 7           | 8            |
| <b>CMC&amp;EA</b> | <b>M4</b> |             | 1           | 4.5         | 9.5         | 9           | 11          | 11          | 11           |
|                   | M5        |             | 0           | 1           | 3           | 8           | 5.5         | 8.5         | 8            |
|                   |           | <b>Mean</b> | <b>0.75</b> | <b>3.38</b> | <b>3.25</b> | <b>7.25</b> | <b>6.88</b> | <b>7.63</b> | <b>8</b>     |
|                   |           | <b>SD</b>   | <b>0.5</b>  | <b>2.29</b> | <b>4.37</b> | <b>1.71</b> | <b>3.42</b> | <b>2.93</b> | <b>2.45</b>  |
|                   |           | <b>SEM</b>  | <b>0.25</b> | <b>1.14</b> | <b>2.18</b> | <b>0.85</b> | <b>1.71</b> | <b>1.46</b> | <b>1.22</b>  |
|                   | M1        |             | 0.5         | 6.5         | 10.5        | 5           | 20          | 13          | 18           |
|                   | M2        |             | 0.5         | 0.5         | 3.5         | 17          | 6           | 9           | 7            |
|                   | M3        |             | 1           | 1.5         | 9           | 8           | 5           | 7           | 8            |
|                   | M4        |             | 1.5         | 2           | 4.5         | 14          | 9           | 10          | 15           |
| <b>ECR&amp;EA</b> | <b>M5</b> |             | 0.5         | 0.5         | 3           | 5           | 2.5         | 6           | 4            |
|                   | M6        |             | 3           | 3           | 4           | 8           | 10          | 7           | 10           |
|                   |           | <b>Mean</b> | <b>1.17</b> | <b>2.33</b> | <b>5.75</b> | <b>9.5</b>  | <b>8.75</b> | <b>8.67</b> | <b>10.33</b> |
|                   |           | <b>SD</b>   | <b>0.98</b> | <b>2.25</b> | <b>3.17</b> | <b>4.93</b> | <b>6.15</b> | <b>2.58</b> | <b>5.24</b>  |
|                   |           | <b>SEM</b>  | <b>0.4</b>  | <b>0.92</b> | <b>1.3</b>  | <b>2.01</b> | <b>2.51</b> | <b>1.05</b> | <b>2.14</b>  |
|                   | M2        |             | 1           | 14          | 17.5        | 21          | 21          | 20          | 14           |
|                   | M3        |             | 1.5         | 11          | 16          | 17          | 15          | 18          | 13           |
|                   | M4        |             | 0           | 8           | 9           | 15          | 8           | 10          | 8            |
| <b>W50&amp;EA</b> | <b>M5</b> |             | 1           | 11          | 10          | 16          | 9           | 12          | 7            |
|                   | M6        |             | 1           | 12          | 10          | 8.5         | 9           | 8           | 9            |
|                   |           | <b>Mean</b> | <b>0.9</b>  | <b>11.2</b> | <b>12.5</b> | <b>15.5</b> | <b>12.4</b> | <b>13.6</b> | <b>10.2</b>  |
|                   |           | <b>SD</b>   | <b>0.55</b> | <b>2.17</b> | <b>3.94</b> | <b>4.53</b> | <b>5.55</b> | <b>5.18</b> | <b>3.11</b>  |
|                   |           | <b>SEM</b>  | <b>0.24</b> | <b>0.97</b> | <b>1.76</b> | <b>2.02</b> | <b>2.48</b> | <b>2.32</b> | <b>1.39</b>  |

Figure 6 Anti-CCP antibody titre

|              | <b>CMC</b> | <b>ECR527</b> | <b>W50</b> | <b>CMC&amp;EA</b> | <b>ECR527&amp;EA</b> | <b>W50&amp;EA</b> |
|--------------|------------|---------------|------------|-------------------|----------------------|-------------------|
|              | 584.41     | 1405.37       | 344.28     | 966.211           | 787.48               | 698.5             |
|              | 584.41     | 1327.3        | 382.17     | 991.835           | 863.95               | 647.76            |
|              | 635.08     | 1366.3        | 1043.16    | 559.097           | 762.04               | 2296.65           |
|              | 1392.34    | 1483.72       | 889.48     | 546.445           | 762.04               | 2242.37           |
|              | 749.32     | 559.1         | 445.32     | 812.951           | 622.41               | 711.2             |
|              | 736.61     | 521.15        | 457.95     | 685.809           | 546.45               | 673.12            |
|              | 647.76     | 521.15        |            | 927.819           | 673.12               | 1171.91           |
|              | 609.74     | 508.51        |            | 1043.156          | 711.2                | 1107.45           |
|              |            | 445.32        |            |                   | 749.32               | 889.48            |
|              |            | 407.43        |            |                   | 774.76               | 863.95            |
|              |            | 851.19        |            |                   | 902.25               |                   |
|              |            | 774.76        |            |                   | 889.48               |                   |
| <b>Mean</b>  | 742.46     | 847.61        | 593.73     | 816.67            | 753.71               | 1130.24           |
| <b>STDEV</b> | 270.05     | 425.03        | 295.60     | 197.56            | 105.70               | 626.47            |
| <b>SEM</b>   | 37.13      | 173.52        | 30.94      | 97.61             | 43.15                | 280.17            |

Figure 7 *P.ging* antibody titre

|              | <b>CMC</b> | <b>ECR527</b> | <b>W50</b> | <b>CMC&amp;EA</b> | <b>ECR527&amp;EA</b> | <b>W50&amp;EA</b> |
|--------------|------------|---------------|------------|-------------------|----------------------|-------------------|
|              | 11.3       | 7.77          | 10.5       | 4.67              | 9.85                 | 26.64             |
|              | 2.87       | 11.16         | 9.93       | 8.94              | 14.04                | 15.42             |
|              | 5.92       | 7.11          | 9.11       | 11.52             | 13.62                | 20.27             |
|              | 5.69       | 5.81          |            | 15.81             | 24.64                | 28.65             |
|              |            | 6.22          |            |                   | 9.66                 | 28.52             |
|              |            | 9.17          |            |                   | 15.78                |                   |
| <b>Mean</b>  | 6.45       | 7.87          | 9.85       | 10.24             | 14.60                | 23.90             |
| <b>STDEV</b> | 3.52       | 2.00          | 0.70       | 4.67              | 5.49                 | 5.84              |
| <b>SEM</b>   | 1.76       | 0.82          | 0.40       | 2.33              | 2.24                 | 2.61              |
